# Supplementary material
Source: publisher figshare collection journal article supplement (https://geolsoc.figshare.com/ndownloader/files/22898984)
Supplement: Supplementary file 1 [file 22898984]

Table S1– Surface samples of FF borrow area: Concentrations of As, Cd, Cr, Cu, Ni, Pb, Zn and Hg (mg kg-1) and PCBs, PAHs e HCB (ng g-1). Classification according to the Portuguese legislation (Ordinance 1450/2007).

| **Station** | **As** | **Cd** | **Cr** | **Cu** | **Ni** | **Pb** | **Zn** | **Hg** | **tPCB** | **tPAH** | **HCB** | **Degree of contamination** |
| --- | --- | --- | --- | --- | --- | --- | --- | --- | --- | --- | --- | --- |
| **(mg kg-1)** | **(mg kg-1)** | **(mg kg-1)** | **(mg kg-1)** | **(mg kg-1)** | **(mg kg-1)** | **(mg kg-1)** | **(mg kg-1)** | **(ng g-1)** | **(ng g-1)** | **(ng g-1)** |
| **FFLS_18** | <LQ | <LQ | <LQ | <LQ | <LQ | <LQ | <LQ | < LQ | 0,16 | 2,4 | <LQ | Class 1 |
| **FFLS_29** | <LQ | <LQ | <LQ | <LQ | <LQ | <LQ | <LQ | 0,005 | 0,51 | 3,5 | <LQ | Class 1 |
| **FFLS_3** | <LQ | <LQ | <LQ | <LQ | <LQ | <LQ | <LQ | 0,013 | 0,25 | 2,1 | 0,1 | Class 1 |
| **FFLS_50** | <LQ | <LQ | 11 | <LQ | <LQ | <LQ | <LQ | < LQ | 0,04 | 3,40 | 0,01 | Class 1 |
| **FFLS_77** | <LQ | <LQ | <LQ | <LQ | <LQ | <LQ | <LQ | 0,006 | 0,14 | 3,4 | <LQ | Class 1 |
| **FFLS_8** | <LQ | <LQ | <LQ | <LQ | <LQ | <LQ | <LQ | < LQ | 0,08 | 1,7 | <LQ | Class 1 |
| **FFLS_10** | <LQ | <LQ | <LQ | <LQ | <LQ | <LQ | <LQ | < LQ | 0,09 | 3,7 | <LQ | Class 1 |
| **FFLS_14** | <LQ | <LQ | <LQ | <LQ | <LQ | <LQ | <LQ | < LQ | 0,05 | 1,9 | 0,03 | Class 1 |
| **FFLS_16** | <LQ | <LQ | <LQ | 25 | <LQ | <LQ | <LQ | 0,005 | 0,15 | 3,30 | 0,04 | Class 1 |
| **FFLS_17** | <LQ | <LQ | <LQ | <LQ | <LQ | <LQ | <LQ | < LQ | 0,25 | 1,1 | 0,1 | Class 1 |
| **FFLS_19** | <LQ | <LQ | <LQ | <LQ | <LQ | <LQ | <LQ | < LQ | 0,09 | 2,4 | 0,02 | Class 1 |
| **FFLS_21** | <LQ | <LQ | <LQ | <LQ | <LQ | <LQ | <LQ | < LQ | 0,19 | 2,8 | <LQ | Class 1 |
| **FFLS_22** | <LQ | <LQ | <LQ | <LQ | <LQ | <LQ | <LQ | < LQ | 0,01 | 1,1 | <LQ | Class 1 |
| **FFLS_24** | <LQ | <LQ | <LQ | <LQ | <LQ | <LQ | <LQ | 0,011 | 0,17 | 1,3 | <LQ | Class 1 |
| **FFLS_28** | <LQ | <LQ | <LQ | <LQ | <LQ | <LQ | <LQ | 0,005 | 0,07 | 1,4 | <LQ | Class 1 |
| **FFLS_30** | <LQ | <LQ | <LQ | <LQ | <LQ | <LQ | <LQ | < LQ | 0,10 | 2,9 | 0,1 | Class 1 |
| **FFLS_31** | <LQ | <LQ | <LQ | <LQ | <LQ | <LQ | <LQ | < LQ | 0,20 | 1,3 | 0,03 | Class 1 |
| **FFLS_33** | <LQ | <LQ | <LQ | <LQ | <LQ | <LQ | <LQ | < LQ | 0,31 | 1,4 | 0,04 | Class 1 |
| **FFLS_35** | <LQ | <LQ | <LQ | <LQ | <LQ | <LQ | <LQ | 0,019 | 0,12 | 5,6 | 0,08 | Class 1 |
| **FFLS_36** | <LQ | <LQ | <LQ | <LQ | <LQ | <LQ | <LQ | < LQ | 0,16 | 1,4 | 0,11 | Class 1 |
| **FFLS_37** | <LQ | <LQ | <LQ | <LQ | <LQ | <LQ | <LQ | < LQ | 0,09 | 1,0 | <LQ | Class 1 |
| **LQ (mg kg-1)** | 17 | 0,5 | <LQ | 7,3 | 19 | 13 | 40 | 0,005 | * | * | 0,01 |  |
| **Class 1** | < 20 | < 1 | <LQ | < 35 | < 30 | < 50 | < 100 | < 0,5 | < 5 | < 300 | < 0,5 |  |
| **Class 2** | 20 - 50 | 1 - 3 | <LQ | 35 - 150 | 30 - 75 | 50 - 150 | 100 - 600 | 0,5 - 1,5 | 5 - 25 | 300 - 2000 | 0,5 – 2,5 |  |
| **Class 3** | 50 - 100 | 3 - 5 | <LQ | 150 - 300 | 75 - 125 | 150 - 500 | 600 - 1500 | 1,5 – 3,0 | 25 - 100 | 2000 - 6000 | 2,5 - 10 |  |
| **Class 4** | 100 - 500 | 5 - 10 | <LQ | 300 - 500 | 125 - 250 | 500 - 1000 | 1500-5000 | 3,0 - 10 | 100 - 300 | 6000 - 20000 | 10 -50 |  |
| **Class 5** | > 500 | > 10 | <LQ | > 500 | >250 | > 1000 | >5000 | > 10 | >300 | >20000 | >50 |  |
|  |  |  | <LQ |  |  |  |  |  |  |  |  |  |
|  |  |  | <LQ |  |  |  |  |  |  |  |  |  |
|  |  |  | <LQ |  |  |  |  |  |  |  |  |  |
|  |  |  | <LQ |  |  |  |  |  |  |  |  |  |
|  |  |  | <LQ |  |  |  |  |  |  |  |  |  |

*The LQ varies with the congener considered
